# Supplementary material
Source: publisher figshare collection journal article supplement (https://acs.figshare.com/ndownloader/files/18519632)
Supplement: Supplementary file 1 [file 18519632]

## Supporting Information for

### Ultrafine Pt Nanoparticle-Decorated 3D Hybrid Architectures Built from Reduced Graphene Oxide and MXene Nanosheets for Methanol Oxidation

Cuizhen Yang, Quanguo Jiang, Weihua Li,<sup>\*</sup> Haiyan He, Lu Yang, Zhiyong Lu, and Huajie Huang<sup>\*</sup>

<sup>\*</sup>Address correspondence to huanghuajie@hhu.edu.cn, liweihua3@mail.sysu.edu.cn

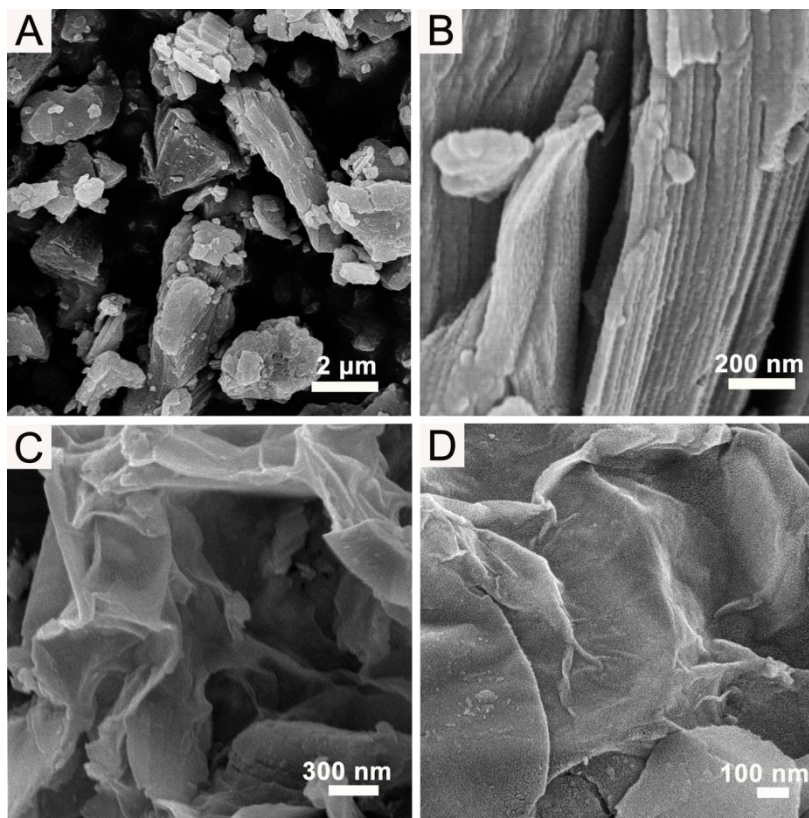

**Figure S1.** Representative SEM images of (A,B) Ti<sub>3</sub>AlC<sub>2</sub> powders and (C,D) Ti<sub>3</sub>C<sub>2</sub>T<sub>x</sub> nanosheets, respectively, revealing the 2D lamellar structure of Ti<sub>3</sub>C<sub>2</sub>T<sub>x</sub> nanosheets.

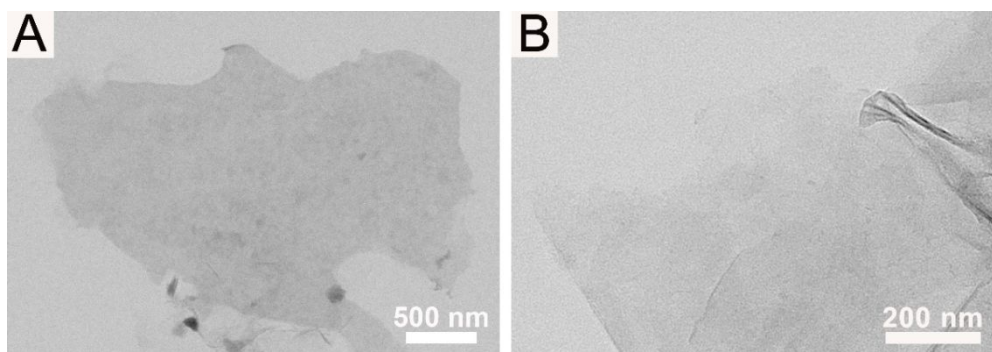

**Figure S2.** Typical TEM images of  $\text{Ti}_3\text{C}_2\text{T}_x$  nanosheets show their ultrathin and transparent nature.

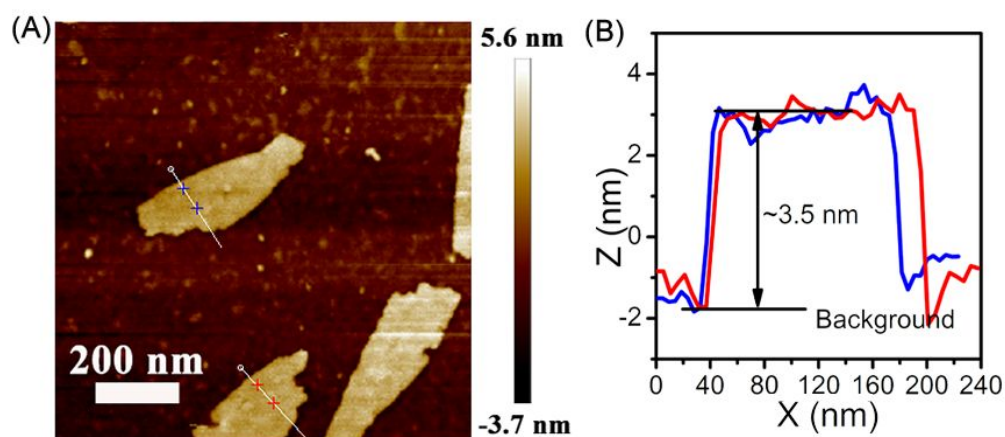

**Figure S3.** (A) Representative AFM image of the  $\text{Ti}_3\text{C}_2\text{T}_x$  nanosheets. (B) The thickness analysis along the white lines discloses that the uniform thickness of the  $\text{Ti}_3\text{C}_2\text{T}_x$  nanosheets is about 3.5 nm.

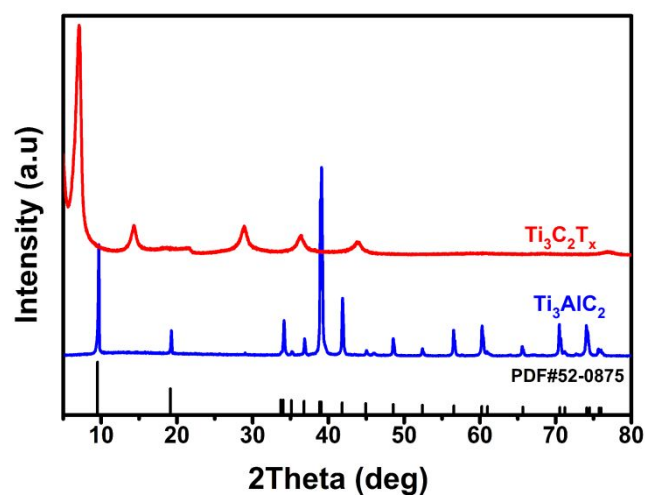

**Figure S4.** The XRD patterns of  $\text{Ti}_3\text{AlC}_2$  powders and  $\text{Ti}_3\text{C}_2\text{T}_x$  nanosheets, indicating the successful exfoliation of bulk  $\text{Ti}_3\text{AlC}_2$  into  $\text{Ti}_3\text{C}_2\text{T}_x$  nanosheets.

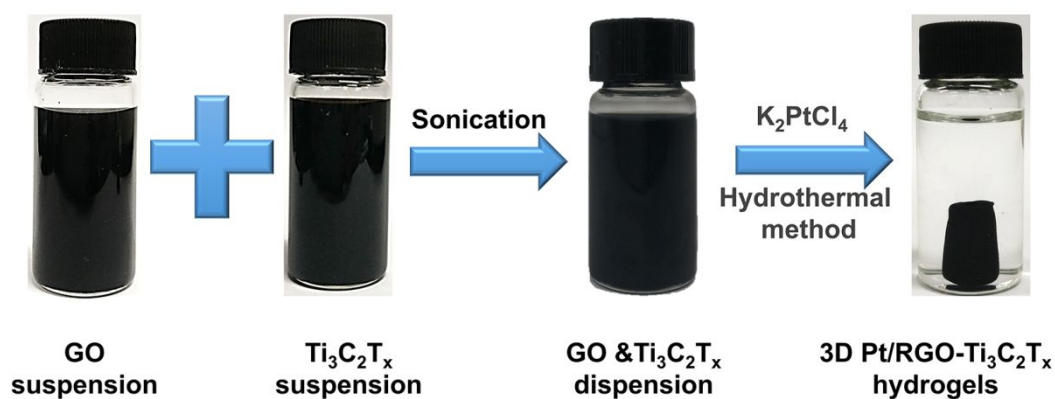

**Figure S5.** The synthetic process for the 3D Pt/RGO- $\text{Ti}_3\text{C}_2\text{T}_x$  hydrogels. It includes: (1) mixture GO and  $\text{Ti}_3\text{C}_2\text{T}_x$  suspension via an ultrasonic treatment; (2) formation of 3D Pt/RGO- $\text{Ti}_3\text{C}_2\text{T}_x$  hydrogel through a solvothermal reaction.

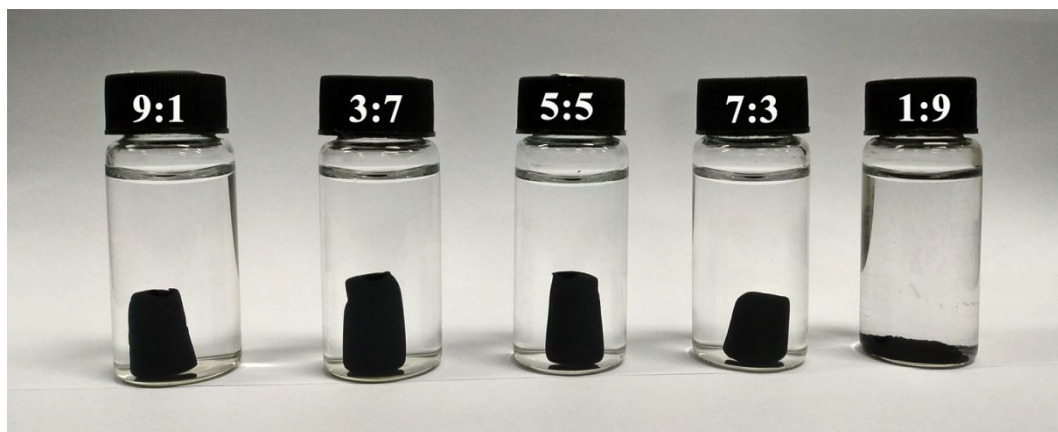

**Figure S6.** The digital photographs of the 3D Pt/RGO-Ti<sub>3</sub>C<sub>2</sub>T<sub>x</sub> hydrogels with varying RGO/Ti<sub>3</sub>C<sub>2</sub>T<sub>x</sub> ratios. It is found that a high Ti<sub>3</sub>C<sub>2</sub>T<sub>x</sub> content (>90 wt.%) will hinder the connection between GO nanosheets, thus making it difficult to obtain the 3D porous architectures.

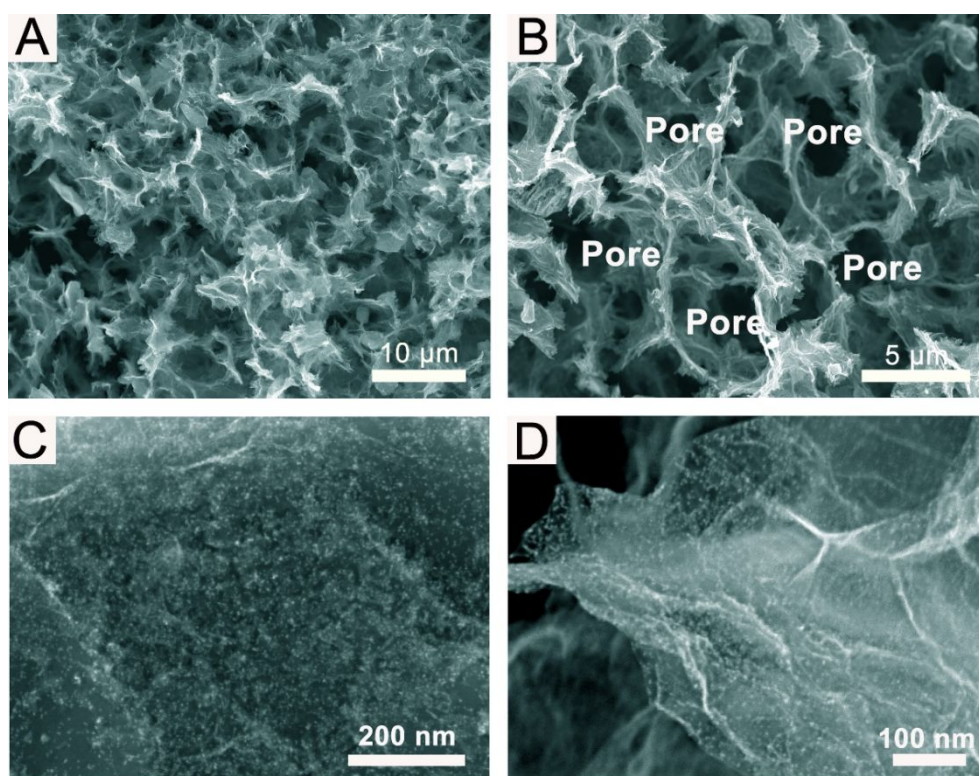

**Figure S7.** FE-SEM images of the 3D Pt/RGO-Ti<sub>3</sub>C<sub>2</sub>T<sub>x</sub> architecture at different magnifications. (A, B) Low-magnification FE-SEM images indicate that the material has numerous well-defined macropores. (C, D) High-magnification FE-SEM images



focused on  $\text{Ti}_3\text{C}_2\text{T}_x$  and graphene regions, respectively, showing a uniform distribution of Pt NPs on both  $\text{Ti}_3\text{C}_2\text{T}_x$  and graphene surfaces.

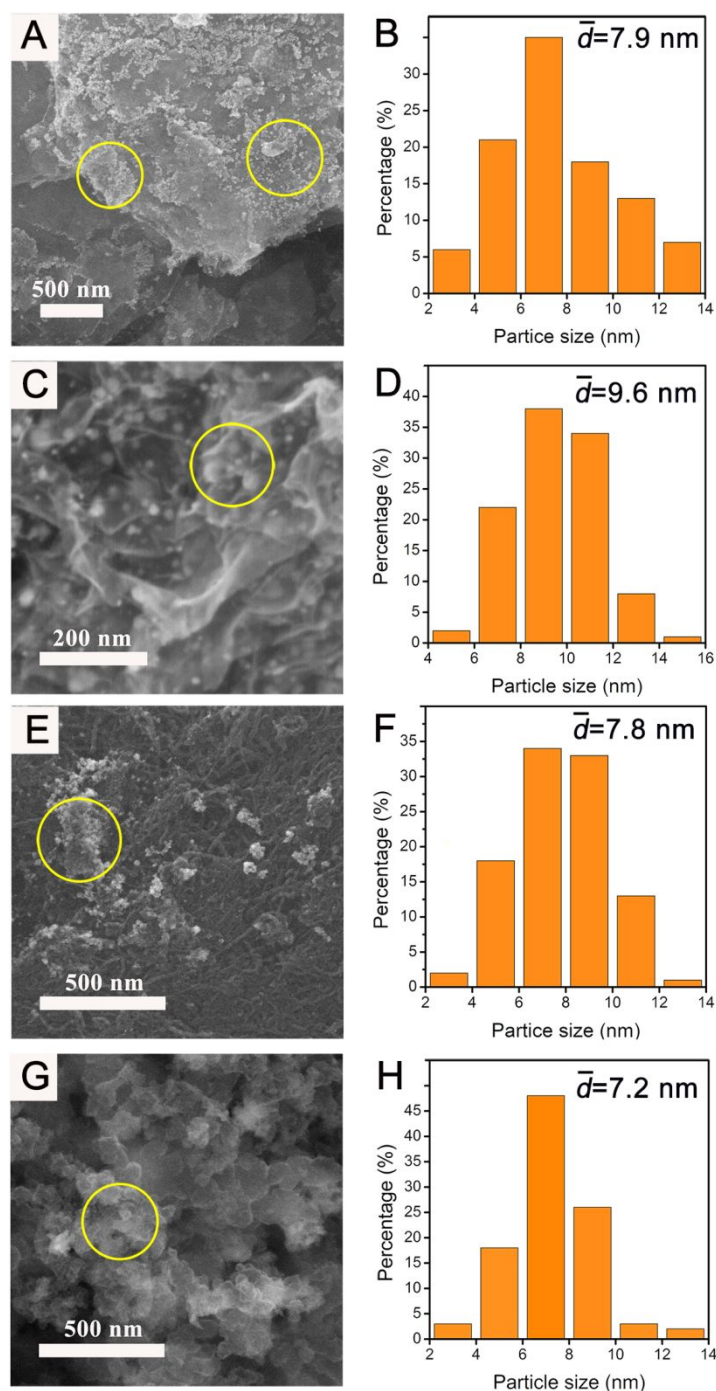

**Figure S8.** FE-SEM images and Pt particle size distribution of (A, B) Pt/Ti<sub>3</sub>C<sub>2</sub>T<sub>x</sub>, (C, D) Pt/RGO, (E, F) Pt/CNT, and (G, H) Pt/C, respectively, revealing that Pt NPs are easy to form aggregates in these samples, as pointed out by the circles.

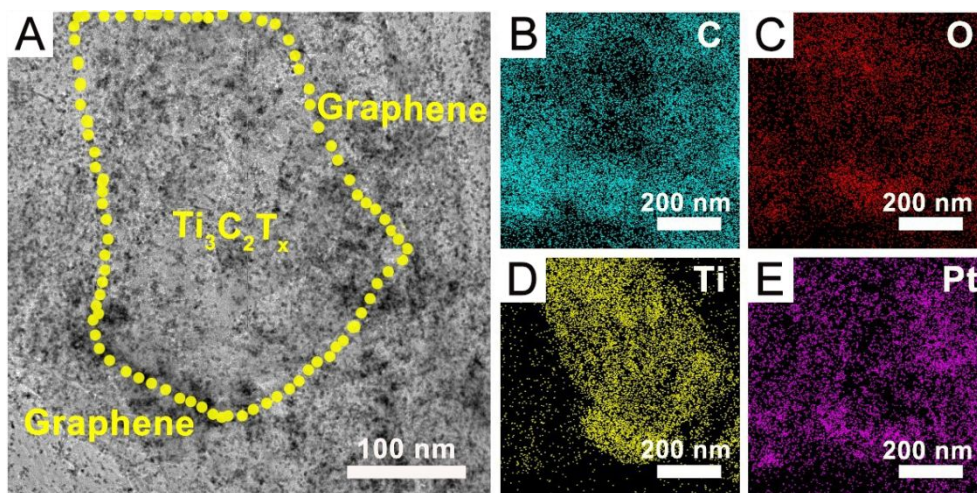

**Figure S9.** (A) TEM image of the Pt/RGO-Ti<sub>3</sub>C<sub>2</sub>T<sub>x</sub> architecture and the corresponding elemental mapping images of (B) C, (C) O, (D) Ti, and (E) Pt elements, demonstrating that the 2D Ti<sub>3</sub>C<sub>2</sub>T<sub>x</sub> nanosheets are confined into the 3D graphene networks.

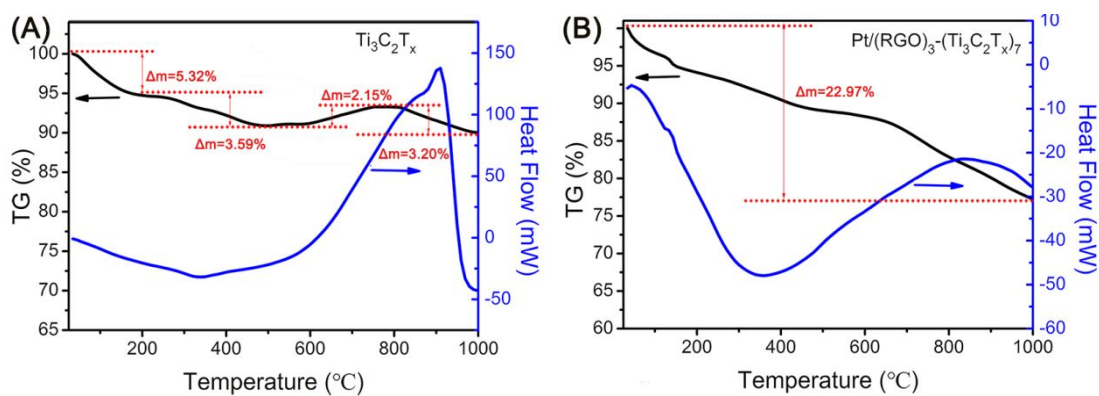

**Figure S10.** TG and DSC curves of (A) Ti<sub>3</sub>C<sub>2</sub>T<sub>x</sub> and (B) Pt/(RGO)<sub>3</sub>-(Ti<sub>3</sub>C<sub>2</sub>T<sub>x</sub>)<sub>7</sub> from room temperature to 1000 °C in argon atmosphere.

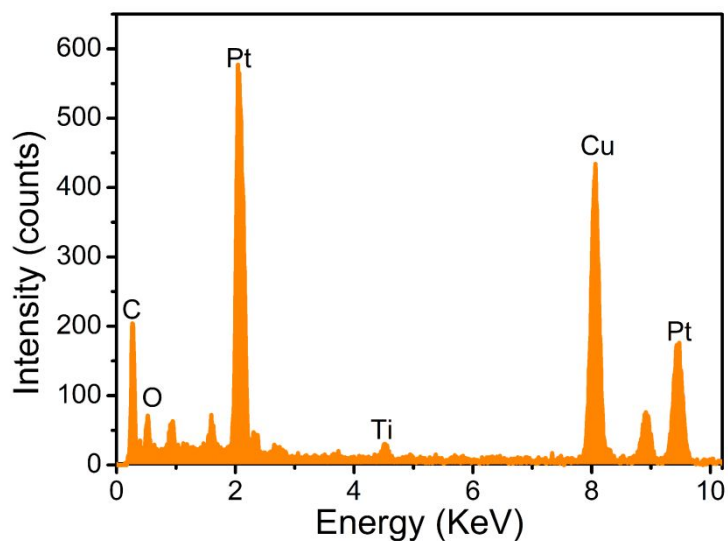

**Figure S11.** EDX spectrum of the 3D Pt/RGO-Ti<sub>3</sub>C<sub>2</sub>T<sub>x</sub> architecture confirms the co-existence of C, O, Ti and Pt components in the material. Since the sample was held on a Cu grid, Cu peaks were also detected.

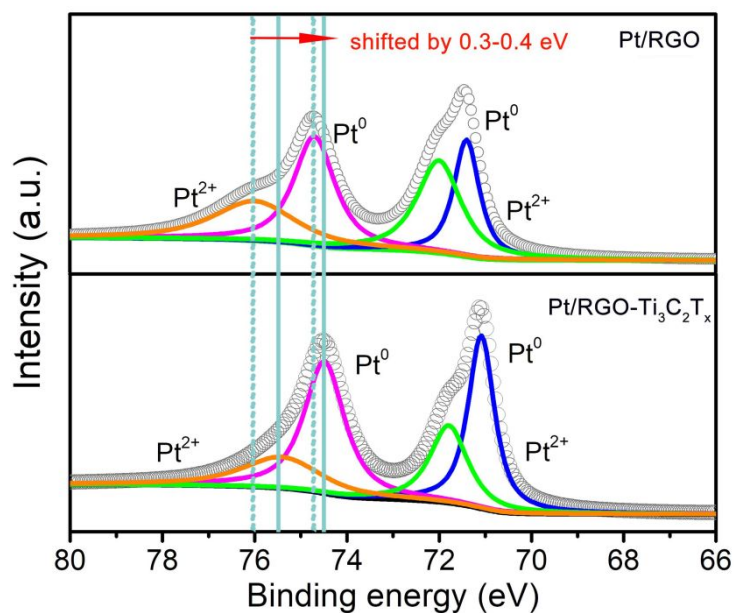

**Figure S12.** Pt 4f spectra of Pt/RGO-Ti<sub>3</sub>C<sub>2</sub>T<sub>x</sub> and Pt/RGO samples, showing that the binding energies for both metallic Pt and Pt<sup>2+</sup> peaks of Pt/RGO-Ti<sub>3</sub>C<sub>2</sub>T<sub>x</sub> are shifted negatively compared with those of Pt/RGO.

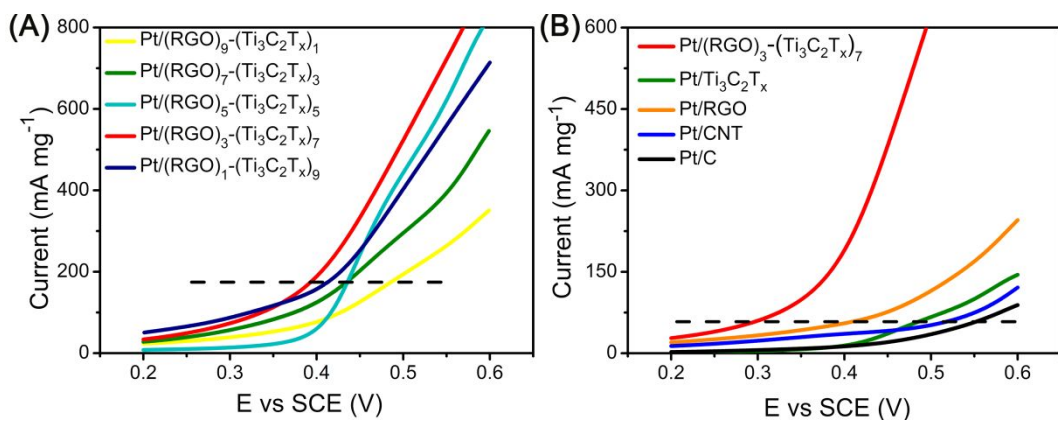

**Figure S13.** Linear sweep voltammetrys of (A) the Pt/RGO-Ti<sub>3</sub>C<sub>2</sub>T<sub>x</sub> architectures with varying RGO/Ti<sub>3</sub>C<sub>2</sub>T<sub>x</sub> ratios, and (B) Pt/(RGO)<sub>3</sub>-(Ti<sub>3</sub>C<sub>2</sub>T<sub>x</sub>)<sub>7</sub>, Pt/RGO, Pt/Ti<sub>3</sub>C<sub>2</sub>T<sub>x</sub>, Pt/CNT and Pt/C in 0.5 M H<sub>2</sub>SO<sub>4</sub> solution at 50 mV s<sup>-1</sup>, showing that the methanol oxidation reaction is much easier to take place on the Pt/(RGO)<sub>3</sub>-(Ti<sub>3</sub>C<sub>2</sub>T<sub>x</sub>)<sub>7</sub> electrode.

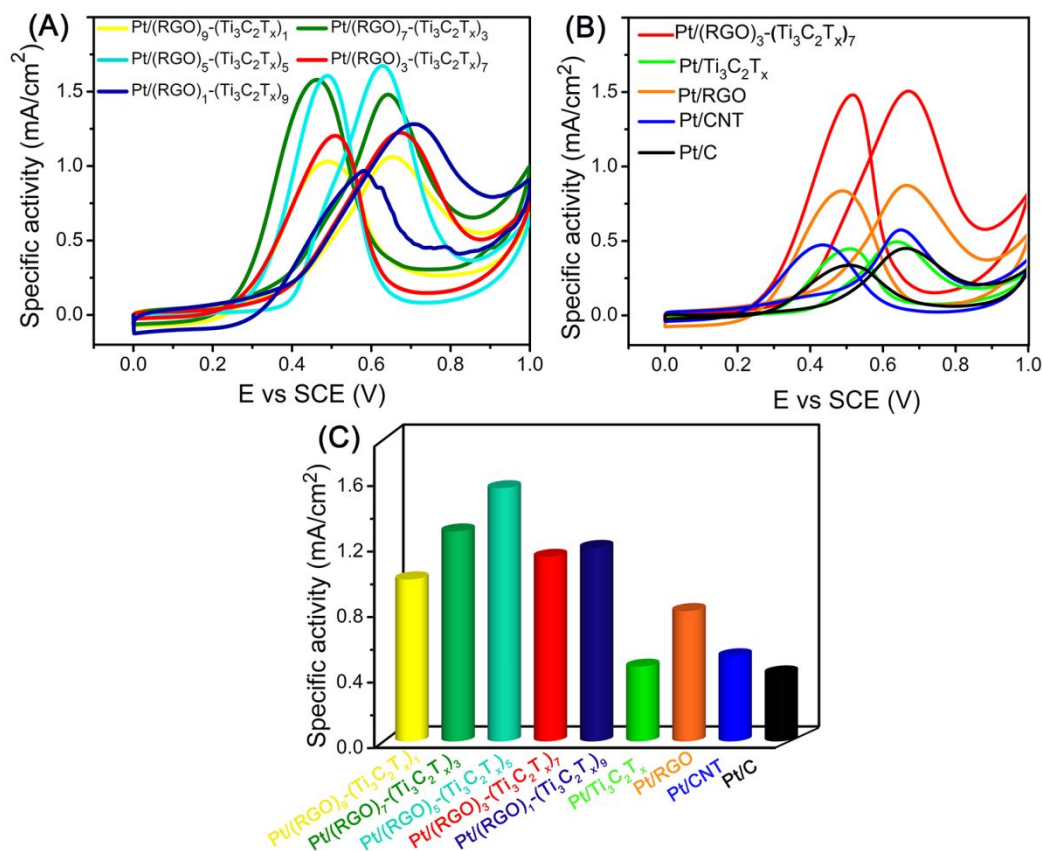

**Figure S14.** ECSA-normalized CV curves of (A) the Pt/RGO-Ti<sub>3</sub>C<sub>2</sub>T<sub>x</sub> architectures



with varying  $\text{RGO}/\text{Ti}_3\text{C}_2\text{T}_x$  ratios, and (B)  $\text{Pt}/(\text{RGO})_3-(\text{Ti}_3\text{C}_2\text{T}_x)_7$ ,  $\text{Pt}/\text{RGO}$ ,  $\text{Pt}/\text{Ti}_3\text{C}_2\text{T}_x$ ,  $\text{Pt}/\text{CNT}$  and  $\text{Pt}/\text{C}$ . (C) Specific activities for different catalysts, confirming that the  $\text{Pt}/\text{RGO}-\text{Ti}_3\text{C}_2\text{T}_x$  electrodes have much higher specific activities in comparison with the reference electrodes.

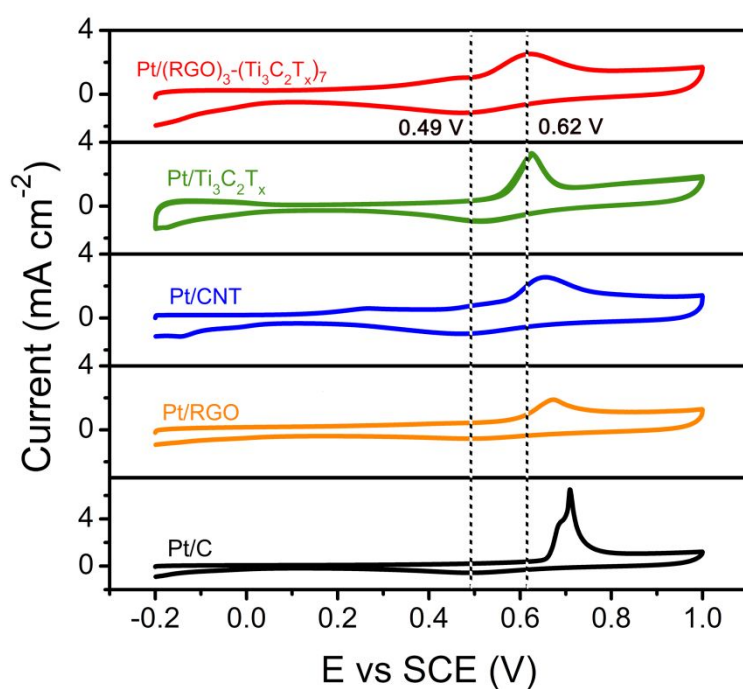

**Figure S15.** CO stripping voltammograms for  $\text{Pt}/(\text{RGO})_3-(\text{Ti}_3\text{C}_2\text{T}_x)_7$ ,  $\text{Pt}/\text{Ti}_3\text{C}_2\text{T}_x$ ,  $\text{Pt}/\text{CNT}$ ,  $\text{Pt}/\text{RGO}$ , and  $\text{Pt}/\text{C}$  catalysts tested in 0.5 M  $\text{H}_2\text{SO}_4$  solution at a scan rate of  $50 \text{ mV s}^{-1}$ , suggesting that  $\text{Pt}/(\text{RGO})_3-(\text{Ti}_3\text{C}_2\text{T}_x)_7$  has the best anti-poisoning ability.

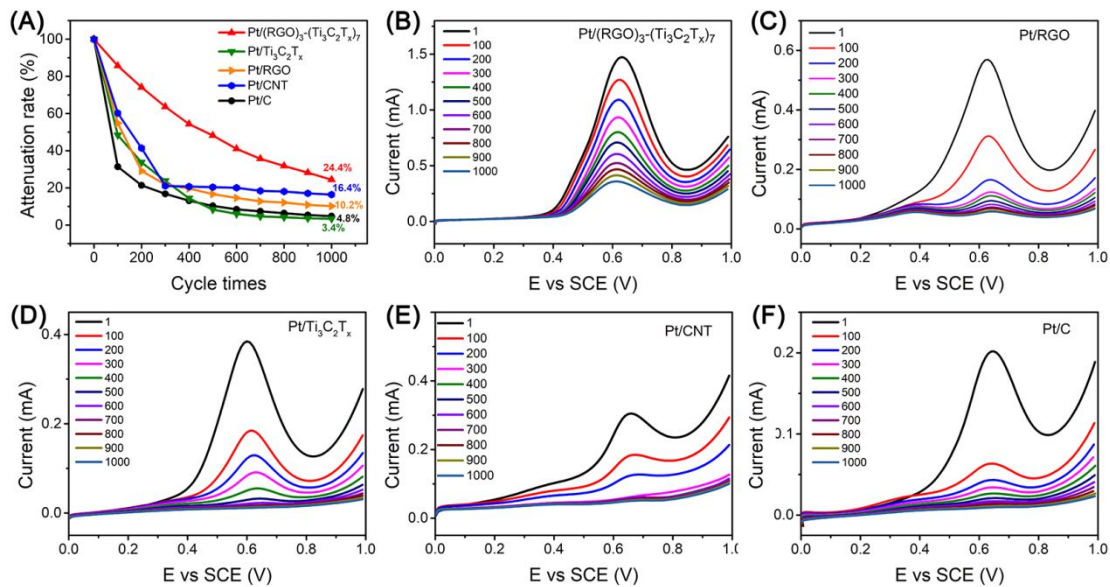

**Figure S16.** The stability behaviors of different catalysts toward methanol oxidation.

(A) Cycling stability of Pt/(RGO)<sub>3</sub>-(Ti<sub>3</sub>C<sub>2</sub>T<sub>x</sub>)<sub>7</sub>, Pt/RGO, Pt/Ti<sub>3</sub>C<sub>2</sub>T<sub>x</sub>, Pt/CNT and Pt/C.

1000 consecutive cycle scans of methanol oxidation in 0.5 M H<sub>2</sub>SO<sub>4</sub> and 0.5 M methanol obtained from (B) Pt/(RGO)<sub>3</sub>-(Ti<sub>3</sub>C<sub>2</sub>T<sub>x</sub>)<sub>7</sub>, (C) Pt/RGO, (D) Pt/Ti<sub>3</sub>C<sub>2</sub>T<sub>x</sub>, (E) Pt/CNT and (F) Pt/C catalysts, revealing the best cycling stability of Pt/(RGO)<sub>3</sub>-(Ti<sub>3</sub>C<sub>2</sub>T<sub>x</sub>)<sub>7</sub>.

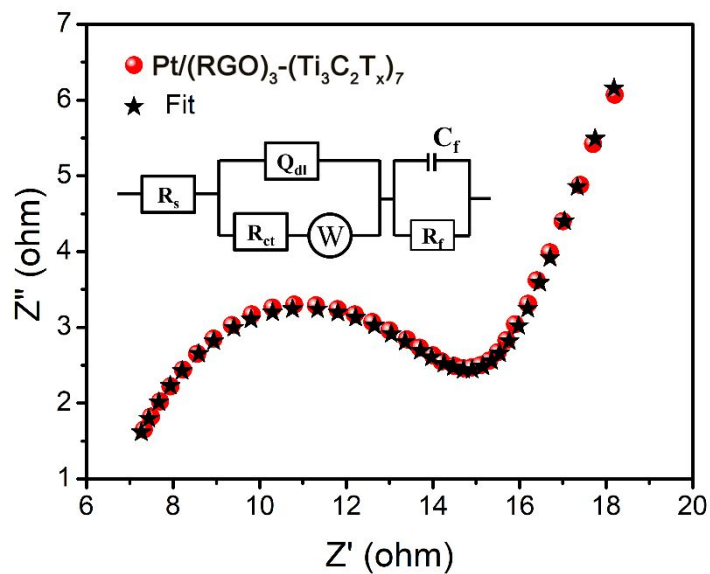

**Figure S17.** AC impedance spectrum of the Pt/RGO-Ti<sub>3</sub>C<sub>2</sub>T<sub>x</sub> electrode and the corresponding fitting curve, proving a good match between the testing and fitting results. The inset is the equivalent circuit:  $R_s$  and  $R_{ct}$  represent the resistances for electrolyte and catalyst, respectively,  $Q_{dl}$  is a constant phase element,  $W$  represents semiinfinite diffusion at the interface between electrolyte and electrode,  $R_f$  and  $C_f$  are the resistance and capacitance for the Nafion-carbon film, respectively.

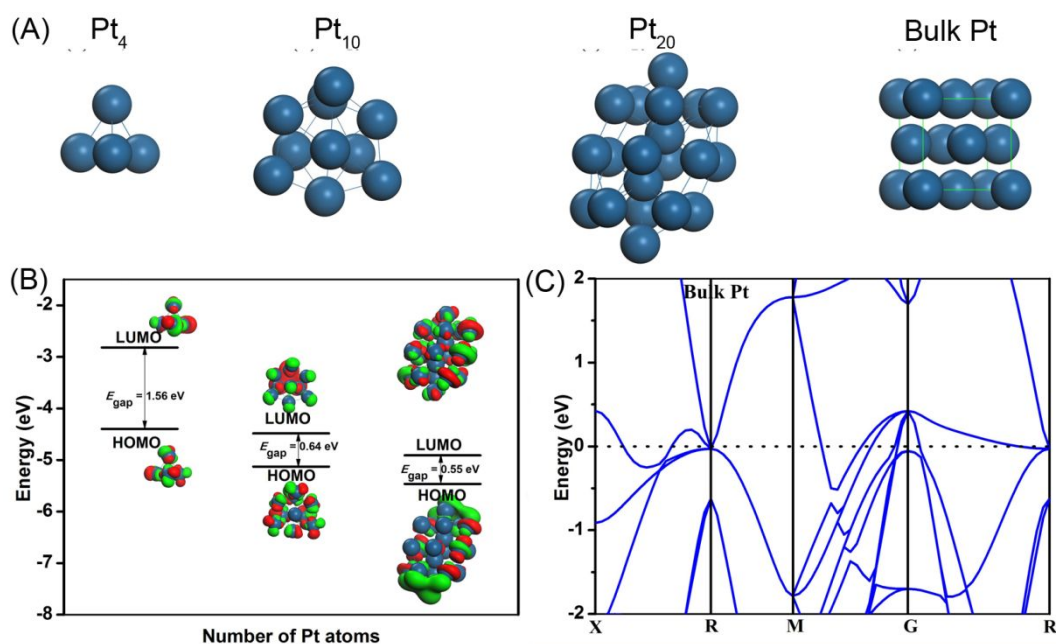

**Figure S18.** (A) The relaxed atomic structures for Pt<sub>4</sub>, Pt<sub>10</sub>, Pt<sub>20</sub>, and bulk Pt. (B) The HOMO-LUMO gap for different Pt clusters and (C) the band structure of bulk Pt, demonstrating that the energy gaps of Pt nanoclusters increase with decreasing the particle size.

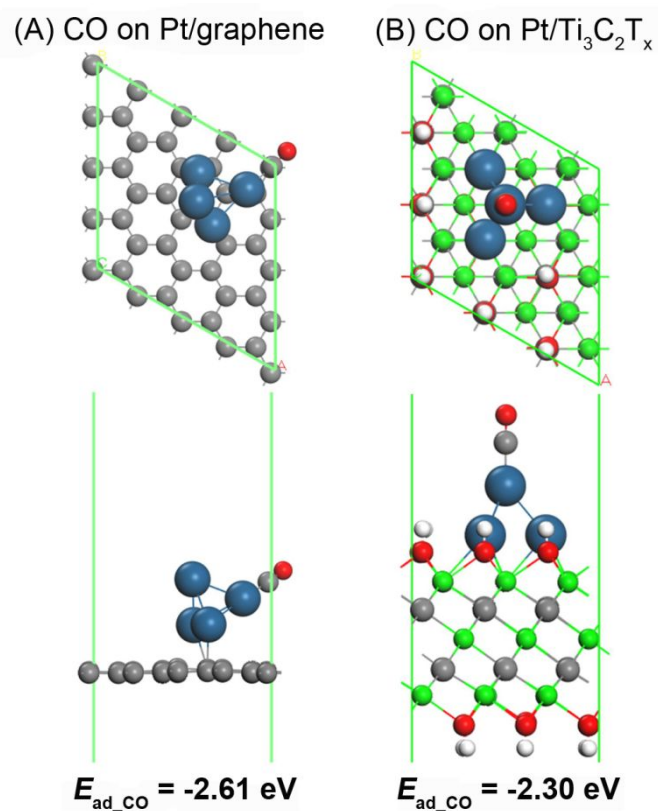

**Figure S19.** The relaxed atomic structures for the adsorption of CO on (A) Pt/graphene and (B) Pt/Ti<sub>3</sub>C<sub>2</sub>T<sub>x</sub>, further confirming the stronger antipoisoning ability for Pt loaded on Ti<sub>3</sub>C<sub>2</sub>T<sub>x</sub> support.



**Table S1.** Compiled study comparing CV results for different catalysts.

| Electrode                                                                   | ECSA<br>(m <sup>2</sup> g <sup>-1</sup> ) | Mass activity<br>(mA mg <sup>-1</sup> ) | Specific activity<br>(mA cm <sup>-2</sup> ) |
|-----------------------------------------------------------------------------|-------------------------------------------|-----------------------------------------|---------------------------------------------|
| Pt/(RGO) <sub>9</sub> -(Ti <sub>3</sub> C<br>2T <sub>x</sub> ) <sub>1</sub> | 37.6                                      | 403.6                                   | 1.1                                         |
| Pt/(RGO) <sub>7</sub> -(Ti <sub>3</sub> C<br>2T <sub>x</sub> ) <sub>3</sub> | 44.6                                      | 620.5                                   | 1.4                                         |
| Pt/(RGO) <sub>5</sub> -(Ti <sub>3</sub> C<br>2T <sub>x</sub> ) <sub>5</sub> | 51.9                                      | 870.5                                   | 1.7                                         |
| Pt/(RGO) <sub>3</sub> -(Ti <sub>3</sub> C<br>2T <sub>x</sub> ) <sub>7</sub> | 90.1                                      | 1102.0                                  | 1.2                                         |
| Pt/(RGO) <sub>1</sub> -(Ti <sub>3</sub> C<br>2T <sub>x</sub> ) <sub>9</sub> | 72.5                                      | 929.5                                   | 1.3                                         |
| Pt/Ti <sub>3</sub> C <sub>2</sub> T <sub>x</sub>                            | 32.0                                      | 158.4                                   | 0.5                                         |
| Pt/RGO                                                                      | 35.4                                      | 305.6                                   | 0.9                                         |
| Pt/CNT                                                                      | 27.5                                      | 155.1                                   | 0.6                                         |
| Pt/C                                                                        | 24.6                                      | 110.8                                   | 0.5                                         |

**Table S2.** Comparison of methanol oxidation behavior on the Pt/(RGO)<sub>3</sub>-(Ti<sub>3</sub>C<sub>2</sub>T<sub>x</sub>)<sub>7</sub> composite and various Pt-based electrocatalysts.

| Catalyst                                                                             | ECSA<br>(m <sup>2</sup> g <sup>-1</sup> ) | Mass activity<br>(mA mg <sup>-1</sup> ) | Scan rate<br>(mV s <sup>-1</sup> ) | Electrolyte                                                        | Reference    |
|--------------------------------------------------------------------------------------|-------------------------------------------|-----------------------------------------|------------------------------------|--------------------------------------------------------------------|--------------|
| Pt/(RGO) <sub>3</sub> -(Ti <sub>3</sub> C <sub>2</sub> T <sub>x</sub> ) <sub>7</sub> | 90.1                                      | 1102.0                                  | 50                                 | 0.5 M H <sub>2</sub> SO <sub>4</sub> +<br>0.5 M CH <sub>3</sub> OH | This<br>work |
| Pt/mesoporous<br>carbon                                                              | N.A.                                      | ~450                                    | 20                                 | 0.5 M H <sub>2</sub> SO <sub>4</sub> +<br>1 M CH <sub>3</sub> OH   | S1           |
| Pt/macroporous<br>carbon                                                             | N.A.                                      | 81.6                                    | 50                                 | 0.5 M H <sub>2</sub> SO <sub>4</sub> +<br>0.5 M CH <sub>3</sub> OH | S2           |
| Pt/N-doped<br>porous carbon                                                          | 24.6                                      | 343.0                                   | 50                                 | 0.5 M H <sub>2</sub> SO <sub>4</sub> +<br>1 M CH <sub>3</sub> OH   | S3           |
| Pt/imidazolium-<br>salt ionic<br>liquid/CNT                                          | 67.6                                      | ~410.0                                  | 50                                 | 0.5 M H <sub>2</sub> SO <sub>4</sub> +<br>0.5 M CH <sub>3</sub> OH | S4           |
| Pt/[BMIM]BF <sub>4</sub> /<br>CNT                                                    | N.A                                       | 155.0                                   | 50                                 | 0.5 M H <sub>2</sub> SO <sub>4</sub> +<br>1 M CH <sub>3</sub> OH   | S5           |
| Pt/3D MoS <sub>2</sub> -G                                                            | 62.3                                      | ~91.8                                   | 10                                 | 1 M H <sub>2</sub> SO <sub>4</sub> +<br>2 M CH <sub>3</sub> OH     | S6           |

|                                        |      |        |     |                                                                  |     |
|----------------------------------------|------|--------|-----|------------------------------------------------------------------|-----|
| Pt/3D C <sub>3</sub> N <sub>4</sub> -G | 69.0 | 612.8  | 20  | 1 M H <sub>2</sub> SO <sub>4</sub> +<br>2 M CH <sub>3</sub> OH   | S7  |
| Pt/N-doped G                           | N.A. | ~400.0 | 200 | 0.5 M H <sub>2</sub> SO <sub>4</sub><br>+1 MCH <sub>3</sub> OH   | S8  |
| Pt/N-doped G<br>nanoribbon             | 64.6 | ~390.0 | 20  | 1 M H <sub>2</sub> SO <sub>4</sub> +<br>2 M CH <sub>3</sub> OH   | S9  |
| PtPd<br>dendrites/G                    | 81.6 | 647.2  | 50  | 0.5 M H <sub>2</sub> SO <sub>4</sub> +<br>1 M CH <sub>3</sub> OH | S10 |
| PtPd dendrites                         | N.A. | 490.0  | 50  | 0.5 M H <sub>2</sub> SO <sub>4</sub> +<br>1 M CH <sub>3</sub> OH | S11 |
| AuPtCu<br>nanowires                    | N.A. | ~500.0 | 50  | 0.1 M HClO <sub>4</sub> +<br>1 M CH <sub>3</sub> OH              | S12 |
| FePtPd<br>nanowires                    | N.A. | 488.7  | 50  | 0.1 M HClO <sub>4</sub> +<br>0.2 M CH <sub>3</sub> OH            | S13 |

**Table S3.** The charge-transfer resistance ( $R_{ct}$ ) of different catalysts.

| Electrode                                                                    | $R_{ct}$    |           |
|------------------------------------------------------------------------------|-------------|-----------|
|                                                                              | Value (ohm) | Error (%) |
| Pt/(RGO) <sub>3</sub> -(Ti <sub>3</sub> C <sub>2</sub> T <sub>x</sub> )<br>7 | 8.7         | 2.4       |
| Pt/Ti <sub>3</sub> C <sub>2</sub> T <sub>x</sub>                             | 25.1        | 10.2      |
| Pt/CNT                                                                       | 17.3        | 4.7       |
| Pt/C                                                                         | 1268.0      | 1.9       |

## References

- (S1) Jiang, H.; Zhao, T.; Li, C.; Ma, J., Functional Mesoporous Carbon Nanotubes and Their Integration in Situ with Metal Nanocrystals for Enhanced Electrochemical Performances. *Chem. Commun.* **2011**, *47*, 8590-85922.
- (S2) Bo, X.; Guo, L., Simple Synthesis of Macroporous Carbon–Graphene Composites and Their Use as a Support for Pt Electrocatalysts. *Electrochim. Acta* **2013**, *90*, 283–290.
- (S3) Su, F.; Tian, Z.; Poh, C. K.; Wang, Z.; Lim, S. H.; Liu, Z.; Lin, J., Pt Nanoparticles Supported on Nitrogen-Doped Porous Carbon Nanospheres as an Electrocatalyst for Fuel Cells. *Chem. Mater.* **2010**, *22*, 832-839.
- (S4) Guo, S.; Dong, S.; Wang, E., Constructing Carbon Nanotube/Pt Nanoparticle Hybrids Using an Imidazolium-Salt-Based Ionic Liquid as a Linker. *Adv. Mater.* **2010**, *22*, 1269-1272.
- (S5) Chu, H.; Shen, Y.; Lin, L.; Qin, X.; Feng, G.; Lin, Z.; Wang, J.; Liu, H.; Li, Y., Ionic-Liquid-Assisted Preparation of Carbon Nanotube-Supported Uniform Noble Metal Nanoparticles and Their Enhanced Catalytic Performance. *Adv. Funct. Mater.* **2010**, *20*, 3747-3752.
- (S6) Gao, Z.; Li, M.; Wang, J.; Zhu, J.; Zhao, X.; Huang, H.; Zhang, J.; Wu, Y.; Fu, Y.; Wang, X., Pt Nanocrystals Grown on Three-Dimensional Architectures Made from Graphene and MoS<sub>2</sub> Nanosheets: Highly Efficient Multifunctional

Electrocatalysts toward Hydrogen Evolution and Methanol Oxidation Reactions.

*Carbon* **2018**, *139*, 369-377.

(S7) Huang, H.; Yang, S.; Vajtai, R.; Wang, X.; Ajayan, P. M., Pt-Decorated 3D Architectures Built from Graphene and Graphitic Carbon Nitride Nanosheets as Efficient Methanol Oxidation Catalysts. *Adv. Mater.* **2014**, *26*, 5160-5165.

(S8) Xiong, B.; Zhou, Y.; Zhao, Y.; Wang, J.; Chen, X.; O'Hayre, R.; Shao, Z., The Use of Nitrogen-Doped Graphene Supporting Pt Nanoparticles as a Catalyst for Methanol Electrocatalytic Oxidation. *Carbon* **2013**, *52*, 181–192.

(S9) Huang, H.; Ye, G.; Yang, S.; Fei, H.; Tiwary, C. S.; Gong, Y.; Vajtai, R.; Tour, J. M.; Wang, X.; Ajayan, P. M., Nanosized Pt Anchored onto 3D Nitrogen-Doped Graphene Nanoribbons Towards Efficient Methanol Electrooxidation. *J. Mater. Chem. A* **2015**, *3*, 19696-19701.

(S10) Guo, S.; Dong, S.; Wang, E., Three-Dimensional Pt-on-Pd Bimetallic Nanodendrites Supported on Graphene Nanosheet: Facile Synthesis and Used as an Advanced Nanoelectrocatalyst for Methanol Oxidation. *Acs Nano* **2010**, *40*, 547–555.

(S11) Wang, L.; Nemoto, Y.; Yamauchi, Y., Direct Synthesis of Spatially-Controlled Pt-on-Pd Bimetallic Nanodendrites with Superior Electrocatalytic Activity. *J. Am. Chem. Soc.* **2011**, *133*, 9674–9677.

(S12) Hong, W.; Wang, J.; Wang, E., Dendritic Au/Pt and Au/PtCu Nanowires with Enhanced Electrocatalytic Activity for Methanol Electrooxidation. *Small* **2014**, *10*, 3262–3265.

(S13) Guo, S.; Zhang, S.; Sun, X.; Sun, S., Synthesis of Ultrathin FePtPd



Nanowires and Their Use as Catalysts for Methanol Oxidation Reaction. *J. Am. Chem. Soc.* **2011**, *133*, 15354–15357.
